# Supplementary material for: GC × GC-MS analysis and hypolipidemic effects of polyphenol extracts from Shanxi-aged vinegar in rats under a high fat diet
Source: Royal Society of Chemistry journal article supplement (doi:10.1039/d0fo01266a), 2020-01-01
Supplement: d0fo01266a1.pdf [file d0fo01266a1.pdf]

1 **Supplementary Data**

2 **Effects of SAVEP on body weights of hyperlipidemic rats.**

3 No significant difference was observed in the body weight of the groups before the beginning of dietary intervention, and the beginning body  
4 weight were  $165.21 \pm 3.15$  g/BW. During the 8-12 weeks period, the weight of rats in Model group were increased by 22.5% compared with that  
5 of the vehicle group. And HD group significantly declined the body weights relative to Model group, and body weights of each group rats were  
6 shown in Table S1.

7 **Table S1** Effects of SAVEP on body weights of hyperlipidemic rats. (n=8)

| Groups  | Week 1              | Week 8              | Week 9              | Week 10             | Week 11             | Week 12                |
|---------|---------------------|---------------------|---------------------|---------------------|---------------------|------------------------|
| Vehicle |                     | $379.14 \pm 6.36^a$ | $408.00 \pm 8.08^a$ | $423.60 \pm 7.45^a$ | $438.33 \pm 9.62^a$ | $455.80 \pm 7.00^a$    |
| Model   |                     | $417.20 \pm 6.17^b$ | $450.67 \pm 6.70^b$ | $477.67 \pm 7.10^b$ | $524.83 \pm 8.84^c$ | $558.20 \pm 7.88^c$    |
| PC      | $165.21 \pm 3.15^a$ | $415.43 \pm 6.48^b$ | $447.50 \pm 8.44^b$ | $469.67 \pm 5.89^b$ | $482.86 \pm 8.24^b$ | $494.17 \pm 9.93^b$    |
| NC      |                     | $416.50 \pm 6.38^b$ | $439.67 \pm 5.73^b$ | $472.17 \pm 4.01^b$ | $495.33 \pm 8.07^b$ | $527.33 \pm 6.85^{cd}$ |
| LD      |                     | $418.36 \pm 6.16^b$ | $451.62 \pm 7.59^b$ | $475.69 \pm 6.77^b$ | $521.57 \pm 7.57^c$ | $547.21 \pm 9.47^{de}$ |

|    |                          |                          |                          |                           |                           |
|----|--------------------------|--------------------------|--------------------------|---------------------------|---------------------------|
| MD | 417.84±7.48 <sup>b</sup> | 449.73±8.57 <sup>b</sup> | 468.68±7.59 <sup>b</sup> | 505.48±8.37 <sup>bc</sup> | 521.43±7.55 <sup>c</sup>  |
| HD | 419.75±7.52 <sup>b</sup> | 446.65±7.11 <sup>b</sup> | 471.34±7.45 <sup>b</sup> | 493.66±7.91 <sup>b</sup>  | 511.43±7.05 <sup>bc</sup> |

---

8 Data are presented as Mean ± SD (n=8). Values in the same row with different letters are significantly different (P<0.05)

9

11 Name is the name of polyphenol derivatives, and Structure is the corresponding polyphenol structure.

12 **Table S2** Results of polyphenol detected by GC×GC-MS in SAVEP

|                             | Name                                                         | Retention I (min) | Retention II (sec) | Volume                   | Concentration (mg/mL) | Structure                                                                             |
|-----------------------------|--------------------------------------------------------------|-------------------|--------------------|--------------------------|-----------------------|---------------------------------------------------------------------------------------|
| Internal Standard Substance | 2,4,5-Trihydroxybenzoic acid, 4TMS derivative                | 47.84 ± 0.05      | 2.32 ± 0.05        | 66901361.07 ± 4479462.63 | 0.200000 ± 0.000000   | 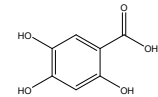   |
| 1                           | 2,3-Dimethylphenol, TMS derivative                           | 20.94 ± 0.07      | 2.89 ± 0.07        | 22596771.78 ± 886422.37  | 0.045870 ± 0.040223   |    |
| 2                           | 3-(4-Hydroxy-3-methoxyphenyl)propionic acid, 2TMS derivative | 46.29 ± 0.89      | 3.04 ± 0.09        | 26879754.21 ± 4565211.04 | 0.080977 ± 0.017270   |    |
| 3                           | Vanillin, TMS derivative                                     | 32.72 ± 0.06      | 3.86 ± 0.05        | 19712497.76 ± 2263546.80 | 0.059213 ± 0.009002   |    |
| 4                           | Vanillic Acid, 2TMS derivative                               | 41.12 ± 0.15      | 2.97 ± 0.05        | 19292239.93 ± 5475138.78 | 0.057391 ± 0.014381   |   |
| 5                           | Ferulic acid, 2TMS derivative                                | 55.72 ± 0.85      | 2.56 ± 0.19        | 14296488.32 ± 2731143.00 | 0.042516 ± 0.005798   |  |
| 6                           | Isoferulic acid, 2TMS derivative                             | 56.52 ± 1.36      | 2.81 ± 0.44        | 12236447.99 ± 298657.66  | 0.036681 ± 0.002402   |  |
| 7                           | 4-Hydroxybenzoic acid, 2TMS derivative                       | 36.12 ± 0.06      | 2.69 ± 0.05        | 10651409.13 ± 2893114.58 | 0.031846 ± 0.008179   |  |

|    |                                                         |              |             |                          |                     |                                                                                       |
|----|---------------------------------------------------------|--------------|-------------|--------------------------|---------------------|---------------------------------------------------------------------------------------|
| 8  | 4-Hydroxybenzaldehyde, TMS derivative                   | 26.19 ± 0.00 | 3.38 ± 0.05 | 6875447.10 ± 1439765.48  | 0.020436 ± 0.003223 | 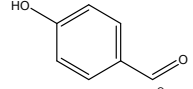   |
| 9  | 4-Coumaric acid, 2TMS derivative                        | 46.64 ± 0.35 | 3.18 ± 0.34 | 6126283.37 ± 645207.47   | 0.012473 ± 0.011107 |    |
| 10 | Trimethyl(5-methyl-2-pentylphenoxy)silane               | 32.99 ± 0.00 | 3.08 ± 0.07 | 3224860.43 ± 3017689.76  | 0.006257 ± 0.007978 |    |
| 11 | Protocatechoic acid, 3TMS derivative                    | 43.72 ± 1.18 | 2.44 ± 0.05 | 1704607.09 ± 1391599.11  | 0.005031 ± 0.003877 |    |
| 12 | (3-Hydroxyphenyl)pentanoic acid, bis(O-trimethylsilyl)- | 60.14 ± 0.21 | 2.18 ± 0.13 | 2483237.12 ± 50517.36    | 0.005027 ± 0.004370 |    |
| 13 | Acetovanillone, TMS derivative                          | 35.92 ± 0.06 | 3.73 ± 0.20 | 7642029.90 ± 10262674.34 | 0.022409 ± 0.029835 |    |
| 14 | 4-Hydroxybenzeneacetic acid, 2TMS derivative            | 36.59 ± 0.10 | 2.88 ± 0.05 | 1770051.00 ± 191434.52   | 0.005284 ± 0.000303 |    |
| 15 | Salicylic acid, 2TMS derivative                         | 31.86 ± 0.06 | 2.72 ± 0.05 | 1975224.72 ± 453300.63   | 0.005893 ± 0.001197 |   |
| 16 | 4'-Hydroxyvalerophenone, TMS derivative                 | 30.09 ± 0.00 | 3.51 ± 0.00 | 2320847.26 ± 792771.42   | 0.004471 ± 0.004228 |  |
| 17 | 3-Hydroxyphenylacetic acid, 2TMS derivative             | 38.89 ± 0.17 | 2.56 ± 0.50 | 1226301.70 ± 125370.37   | 0.003666 ± 0.000282 |  |

|    |                                                                  |                  |                 |                            |                         |                                                                                       |
|----|------------------------------------------------------------------|------------------|-----------------|----------------------------|-------------------------|---------------------------------------------------------------------------------------|
| 18 | Syringaldehyde, TMS derivative                                   | $39.02 \pm 0.15$ | $4.14 \pm 0.05$ | $1584326.31 \pm 632489.35$ | $0.004731 \pm 0.001799$ | 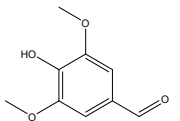   |
| 19 | 3-Hydroxyphenylpropionic acid, ethyl ester, TMS                  | $55.92 \pm 0.75$ | $3.32 \pm 0.00$ | $1104665.88 \pm 90112.58$  | $0.003309 \pm 0.000290$ |    |
| 20 | Trimethylsilyl 5-acetyl-2-(trimethylsilyloxy)benzoic acid        | $39.69 \pm 0.00$ | $2.70 \pm 0.07$ | $532496.48 \pm 295278.53$  | $0.001052 \pm 0.001054$ |    |
| 21 | Gentisic acid, 3TMS derivative                                   | $14.69 \pm 0.10$ | $2.81 \pm 0.14$ | $533654.52 \pm 87905.66$   | $0.001595 \pm 0.000231$ |    |
| 22 | 2-Ethoxyphenol, TMS derivative                                   | $18.86 \pm 0.06$ | $2.88 \pm 0.05$ | $520457.89 \pm 98599.35$   | $0.001562 \pm 0.000319$ |    |
| 23 | Phloretic acid, 2TMS derivative                                  | $38.96 \pm 0.12$ | $3.38 \pm 0.05$ | $644789.56 \pm 138966.52$  | $0.001925 \pm 0.000369$ |    |
| 24 | Paroxypropione, TMS derivative                                   | $42.62 \pm 1.62$ | $2.69 \pm 0.20$ | $402629.83 \pm 250069.45$  | $0.001173 \pm 0.000698$ |   |
| 25 | 2,6-Dihydroxyacetophenone, 2TMS derivative                       | $37.86 \pm 0.06$ | $2.81 \pm 0.05$ | $533547.37 \pm 308157.59$  | $0.001570 \pm 0.000866$ |  |
| 26 | 1-(4-((tert-Butyldimethylsilyl)oxy)-3,5-dimethoxyphenyl)ethanone | $39.32 \pm 0.06$ | $3.64 \pm 0.14$ | $482990.91 \pm 153400.44$  | $0.001440 \pm 0.000423$ |  |

|    |                                                             |                  |                 |                           |                         |                                                                                       |
|----|-------------------------------------------------------------|------------------|-----------------|---------------------------|-------------------------|---------------------------------------------------------------------------------------|
| 27 | 3-Hydroxybenzoic acid, 2TMS derivative                      | $33.82 \pm 0.06$ | $2.69 \pm 0.11$ | $418432.71 \pm 230215.56$ | $0.001238 \pm 0.000648$ | 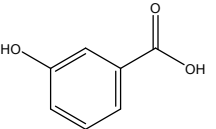   |
| 28 | Syringol, TMS derivative                                    | $27.39 \pm 0.00$ | $3.32 \pm 0.00$ | $527569.56 \pm 202484.03$ | $0.001587 \pm 0.000612$ |    |
| 29 | 6-tert-Butyl-2,4-dimethylphenol                             | $39.79 \pm 0.10$ | $3.54 \pm 0.30$ | $221811.82 \pm 47651.97$  | $0.000663 \pm 0.000133$ |    |
| 30 | Sinapaldehyde, TMS derivative                               | $37.99 \pm 0.10$ | $3.35 \pm 0.05$ | $236122.46 \pm 54749.19$  | $0.000701 \pm 0.000123$ |    |
| 31 | o-Coumaric acid, 2TMS derivative                            | $47.99 \pm 1.56$ | $3.73 \pm 0.22$ | $254024.55 \pm 77861.37$  | $0.000754 \pm 0.000202$ |    |
| 32 | 2-Hydroxyphenethyl alcohol, TMS derivative A                | $30.66 \pm 0.12$ | $3.16 \pm 0.14$ | $217355.11 \pm 130644.57$ | $0.000640 \pm 0.000369$ |   |
| 33 | 2-Hydroxybenzeneacetic acid, 2TMS derivative                | $54.42 \pm 0.21$ | $1.61 \pm 0.09$ | $193482.22 \pm 72167.53$  | $0.000573 \pm 0.000193$ |  |
| 34 | (3,4-Dihydroxyphenyl)hexanoic acid, tris(O-trimethylsilyl)- | $34.02 \pm 0.06$ | $2.75 \pm 0.28$ | $309417.57 \pm 117017.18$ | $0.000942 \pm 0.000410$ |  |
| 35 | Glycol salicylate, 2TMS derivative                          | $34.06 \pm 0.63$ | $3.16 \pm 0.52$ | $216327.13 \pm 41920.66$  | $0.000648 \pm 0.000124$ |  |

|    |                                                   |              |             |                       |                     |                                                                                     |
|----|---------------------------------------------------|--------------|-------------|-----------------------|---------------------|-------------------------------------------------------------------------------------|
| 36 | o-Cresol, TMS derivative                          | 17.24 ± 0.07 | 2.32 ± 0.07 | 240789.33 ± 89528.25  | 0.000464 ± 0.000445 |  |
| 37 | 2-Methyl-6-tert-butylphenol, TMS derivative       | 27.26 ± 0.06 | 2.97 ± 0.05 | 300451.05 ± 162613.72 | 0.000899 ± 0.000470 |  |
| 38 | 4-Isopropylphenol, TMS derivative                 | 36.82 ± 0.06 | 2.81 ± 0.27 | 151121.81 ± 53446.37  | 0.000447 ± 0.000139 |  |
| 39 | 1-Naphthalenol, TMS derivative                    | 31.19 ± 0.00 | 3.54 ± 0.05 | 62216.59 ± 21045.57   | 0.000184 ± 0.000052 |  |
| 40 | Phloroglucinic acid, 4TMS                         | 32.32 ± 0.12 | 2.66 ± 0.34 | 55767.88 ± 10190.83   | 0.000166 ± 0.000021 |  |
| 41 | 2'-Hydroxy-6'-methoxyacetophenone, TMS derivative | 35.42 ± 0.06 | 4.27 ± 0.00 | 61785.63 ± 9543.97    | 0.000186 ± 0.000040 |  |

13 Date in the table are represent mean ± S.D. (n = 3)

**Table S3** List of microbial names in Figure 5E

| Vehicle                 | PC                    | NC                 | Model                   | HD                     |
|-------------------------|-----------------------|--------------------|-------------------------|------------------------|
| p_Bacteroidetes         | p_Firmicutes          | o_Bacteroidales    | c_Clostridia            | g_Prevotella_9         |
| c_Bacteroidia           | g_Faecalibaculum      | g_Blautia          | o_Clostridiales         | f_Prevotellaceae       |
| g_Lactobacillus         | f_Erysipelotrichaceae | g_Alloprevotella   | g_Romboutsia            | c_Bacilli              |
| f_Lactobacillaceae      | o_Erysipelotrichales  | f_Oscill0spiraceae | f_Peptostreptococcaceae | o_Lactobacillales      |
| f_Burkholderiaceae      | c_Erysipelotrichia    | g_Oscillibacter    | g_Lachnostridium        | p_Proteobacteria       |
| o_Betaproteobacteriales |                       |                    | f_Verruciaceae          | c_Gammaproteobacteria  |
| g_Anaerostipes          |                       |                    | c_Verrucomicrobiae      | p_Actinobacteria       |
|                         |                       |                    | p_verrucomicrobia       | c_Actinobacteria       |
|                         |                       |                    | o_Verrucomicrobiales    | o_Micrococcales        |
|                         |                       |                    | g_akkermansia           | f_Micrococcaceae       |
|                         |                       |                    | g_Bacteroides           | g_Rothia               |
|                         |                       |                    | f_Bacteroidaceae        | o_Enterobacteriales    |
|                         |                       |                    | g_Dubosiella            | f_Enterobacteriaceae   |
|                         |                       |                    |                         | g_Escherichia_Shigella |
|                         |                       |                    |                         | g_Streptococcus        |
|                         |                       |                    |                         | f_Streptococcaceae     |
|                         |                       |                    |                         | f_Desulfovibrionaceae  |
|                         |                       |                    |                         | o_Desulfobacterales    |



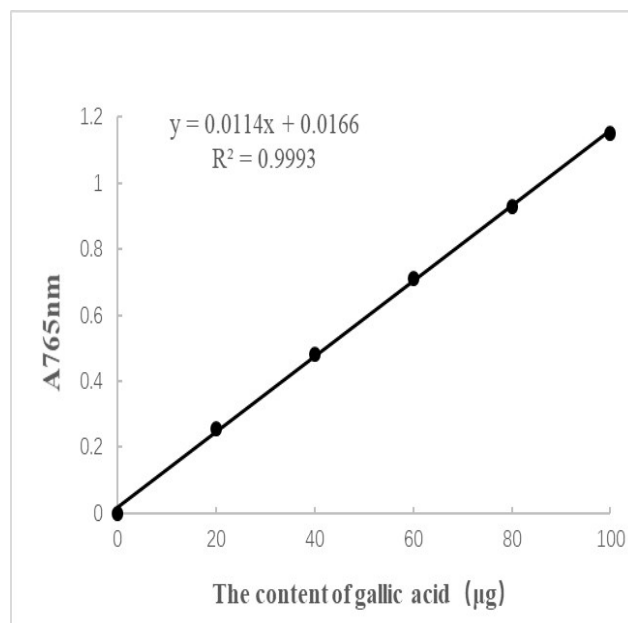

Figure S1. Standard curve of gallic acid
